# Supplementary material for: Experiences from 4 Years of Organization of an External Quality Assessment for Mycobacterium tuberculosis Whole-Genome Sequencing in the European Union/European Economic Area
Source: PubMed Central journal article supplement (PMC9927412; doi:10.1128/spectrum.02244-22), 2022-12-08
Supplement: spectrum.02244-22-s0001.pdf [file spectrum.02244-22-s0001.pdf]

**Supplementary Figure 1. EQA Workflow**

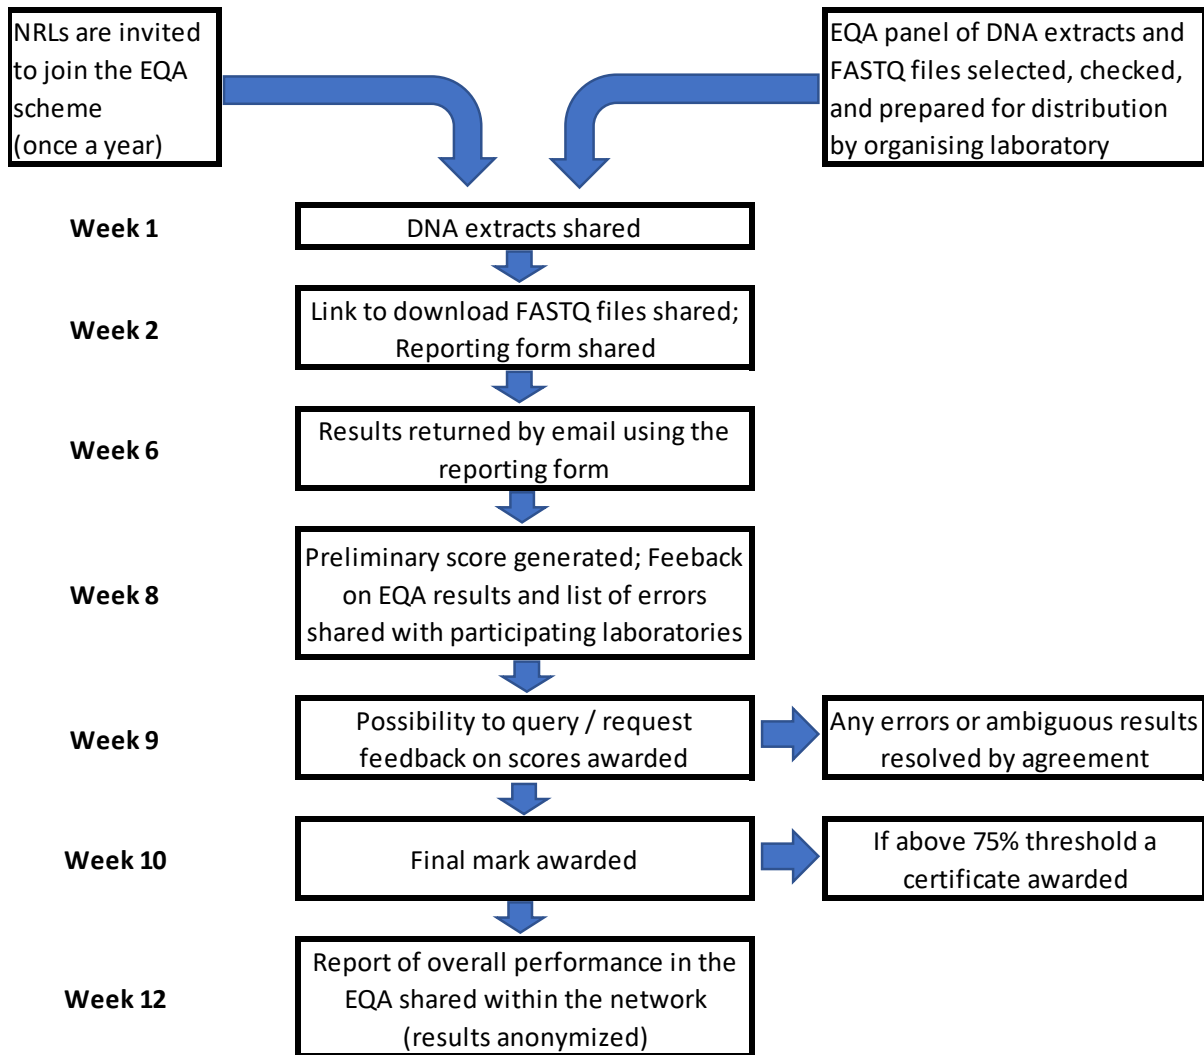

NRL = EU/EEU National TB reference laboratories

EQA = External quality assessment
